# Supplementary material for: Citric acid promoted melanin synthesis in B16F10 mouse melanoma cells, but inhibited it in human epidermal melanocytes and HMV-II melanoma cells via the GSK3β/β-catenin signaling pathway
Source: PubMed Central journal article supplement (PMC7746170; doi:10.1371/journal.pone.0243565), 2020-12-17

Fig 4A Tyrosinase

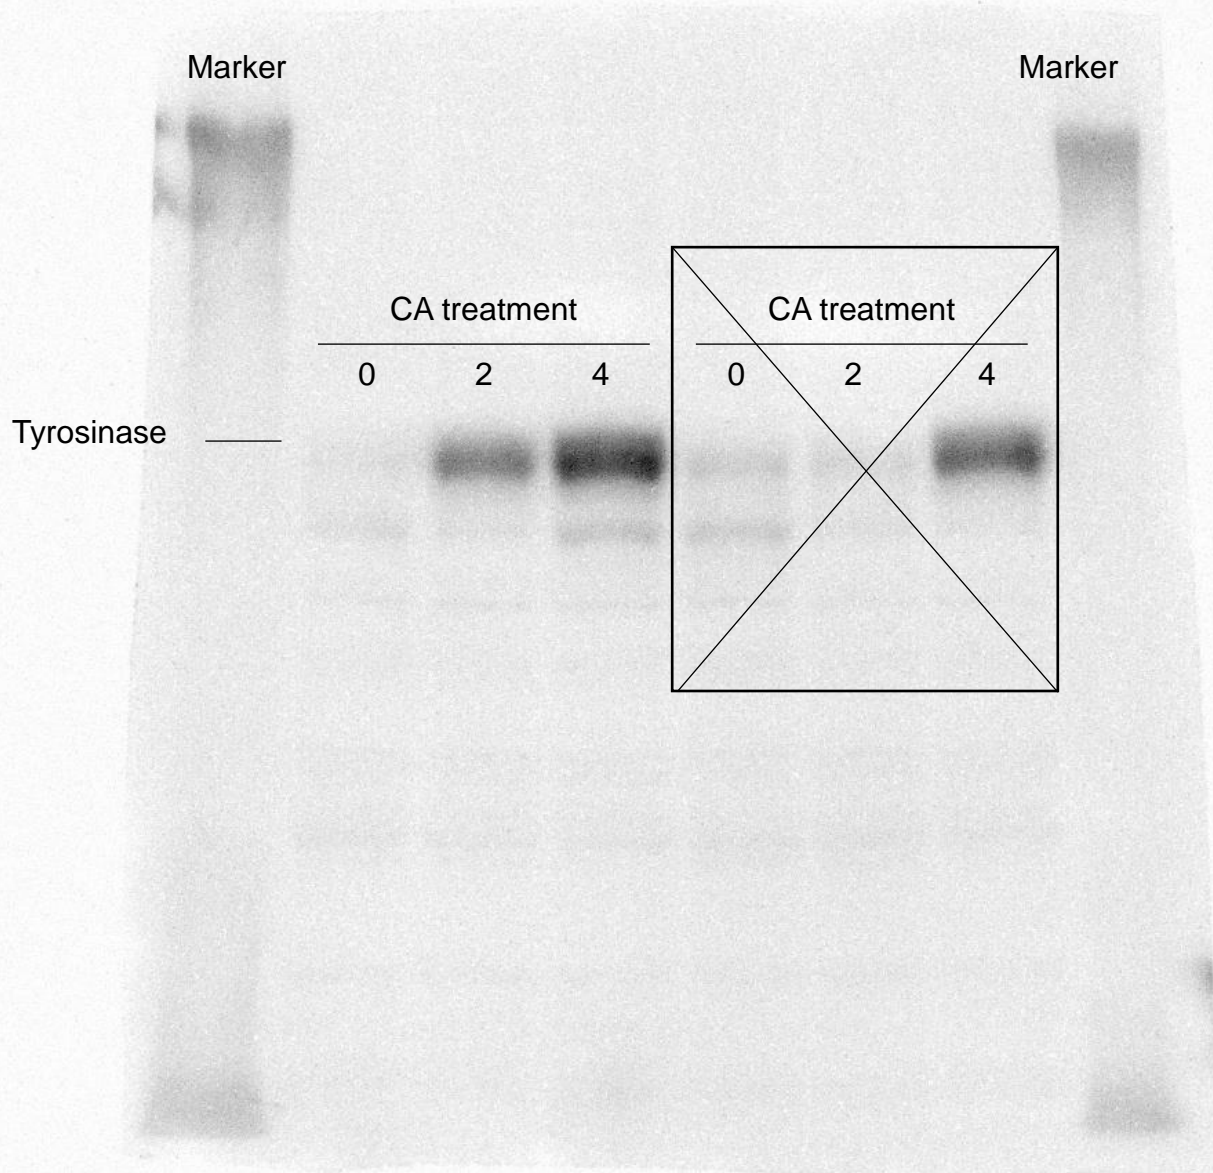

Fig 4A MITF

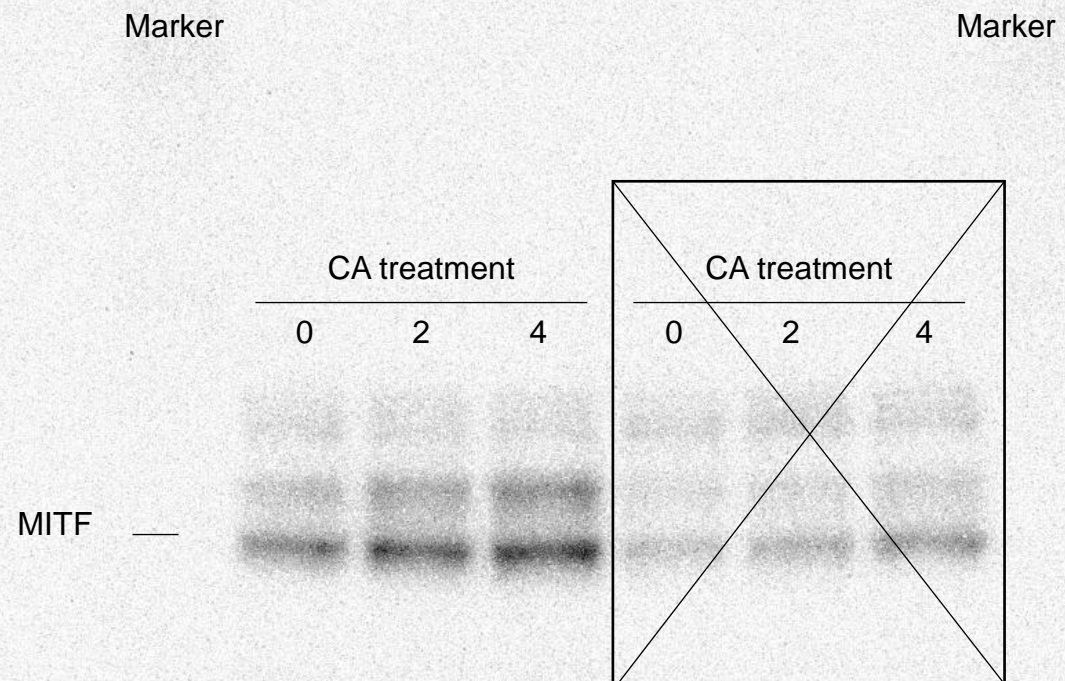

Fig 4A  $\beta$ -actin for TYR and MITF

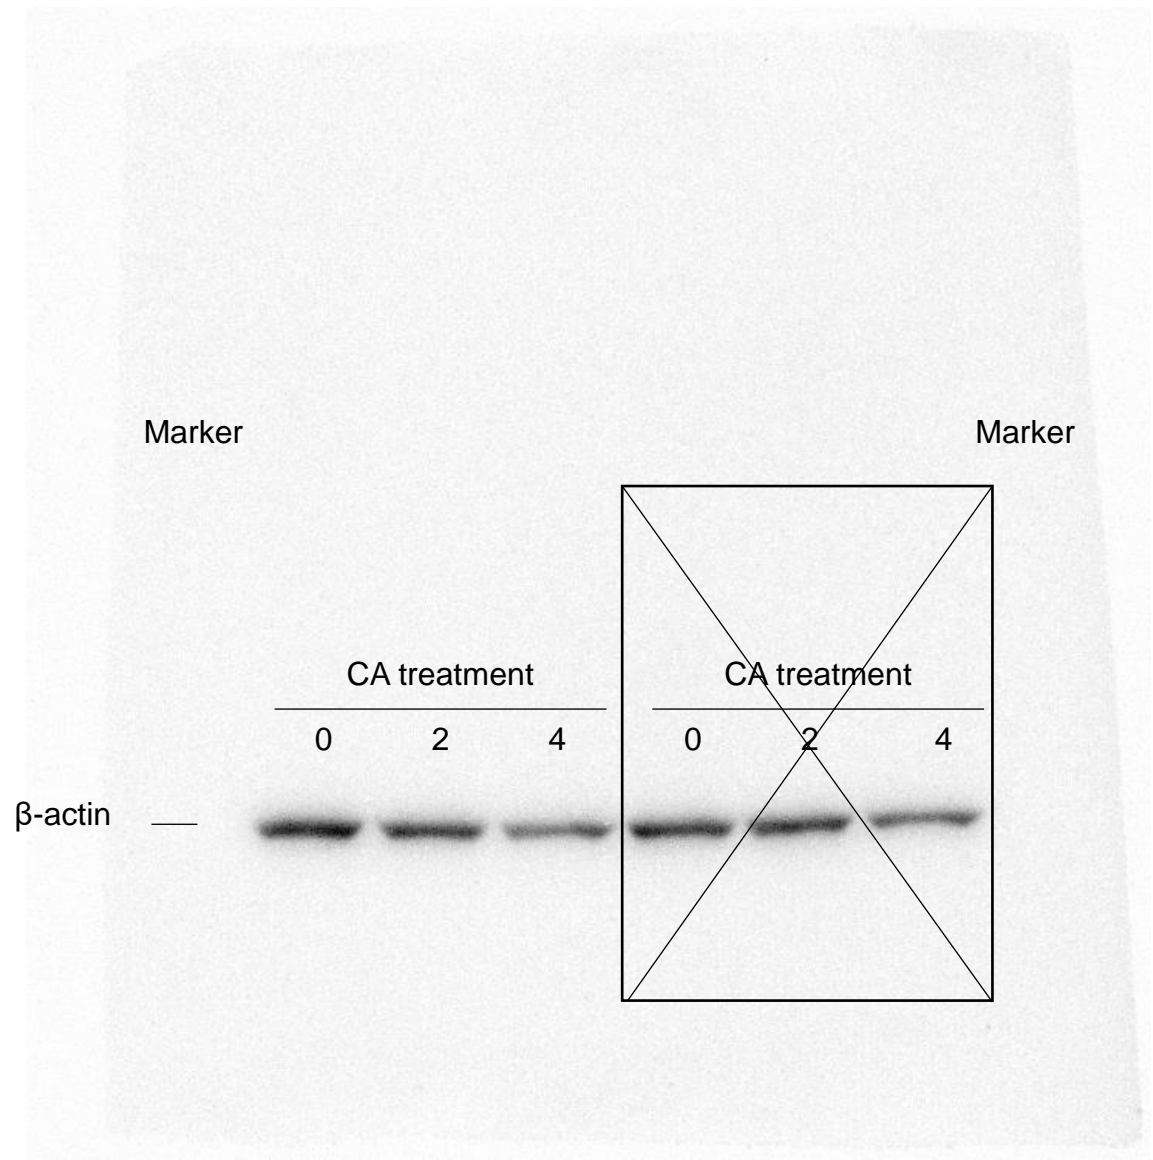

Fig 4A GSK3 $\beta$ , pGSK3 $\beta$

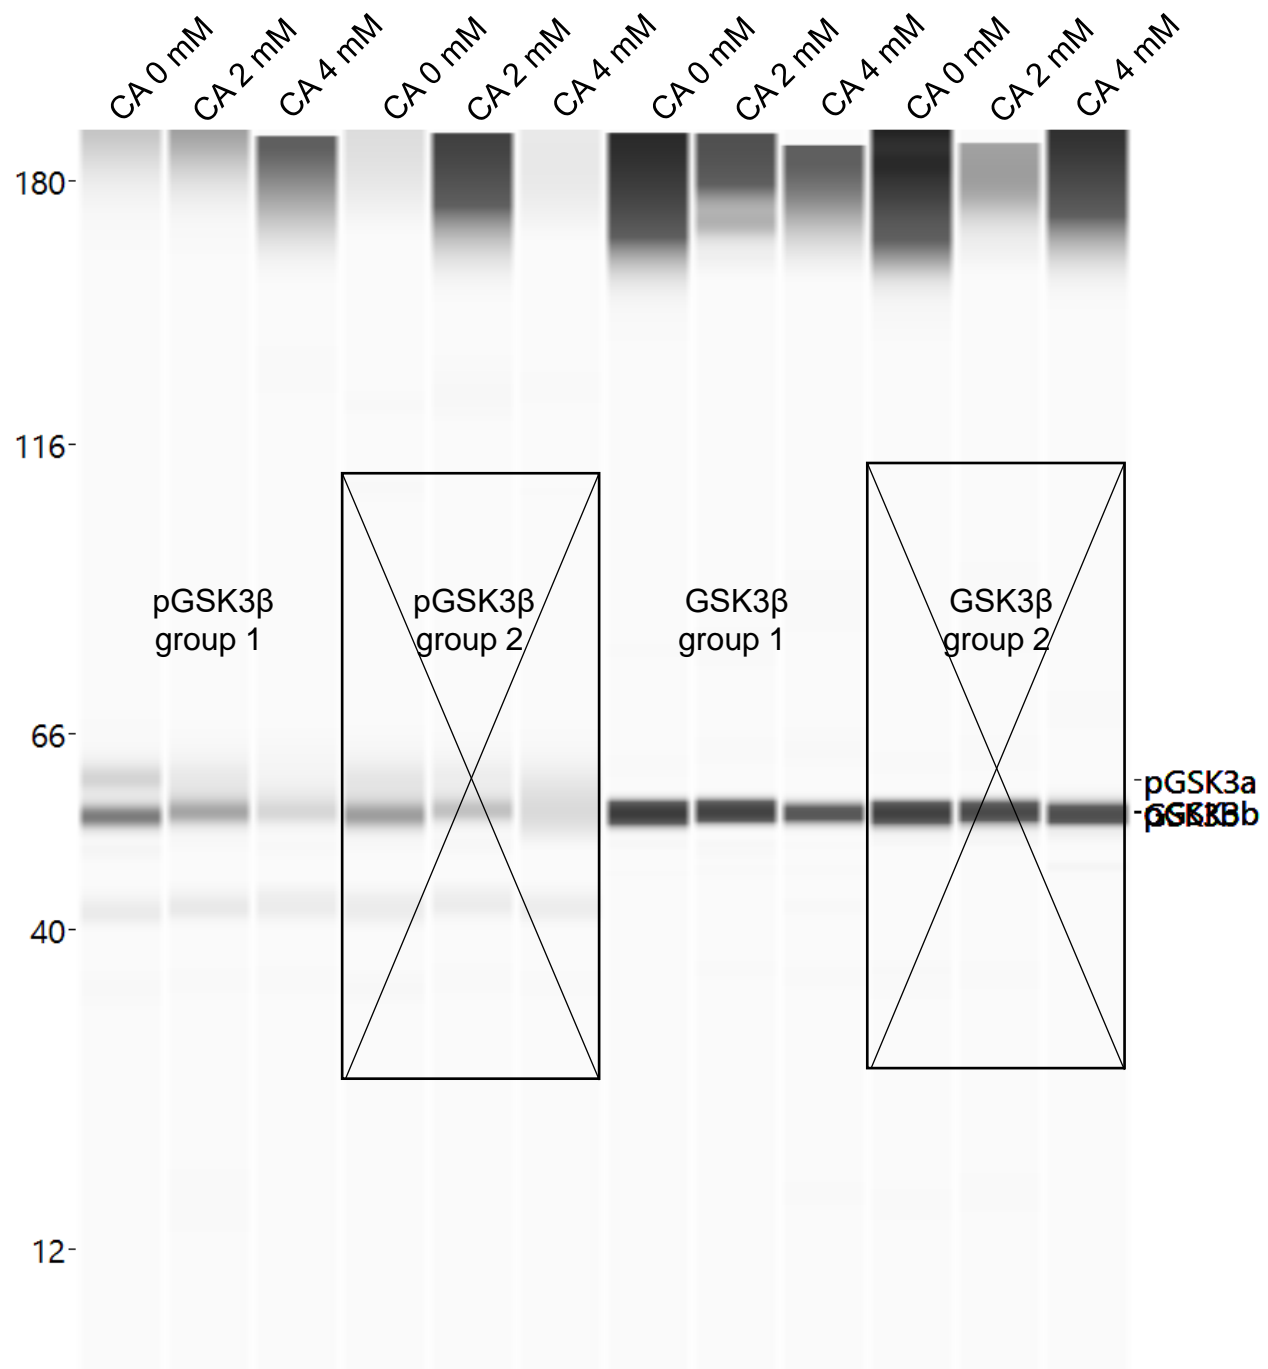

Fig 4A GAPDH

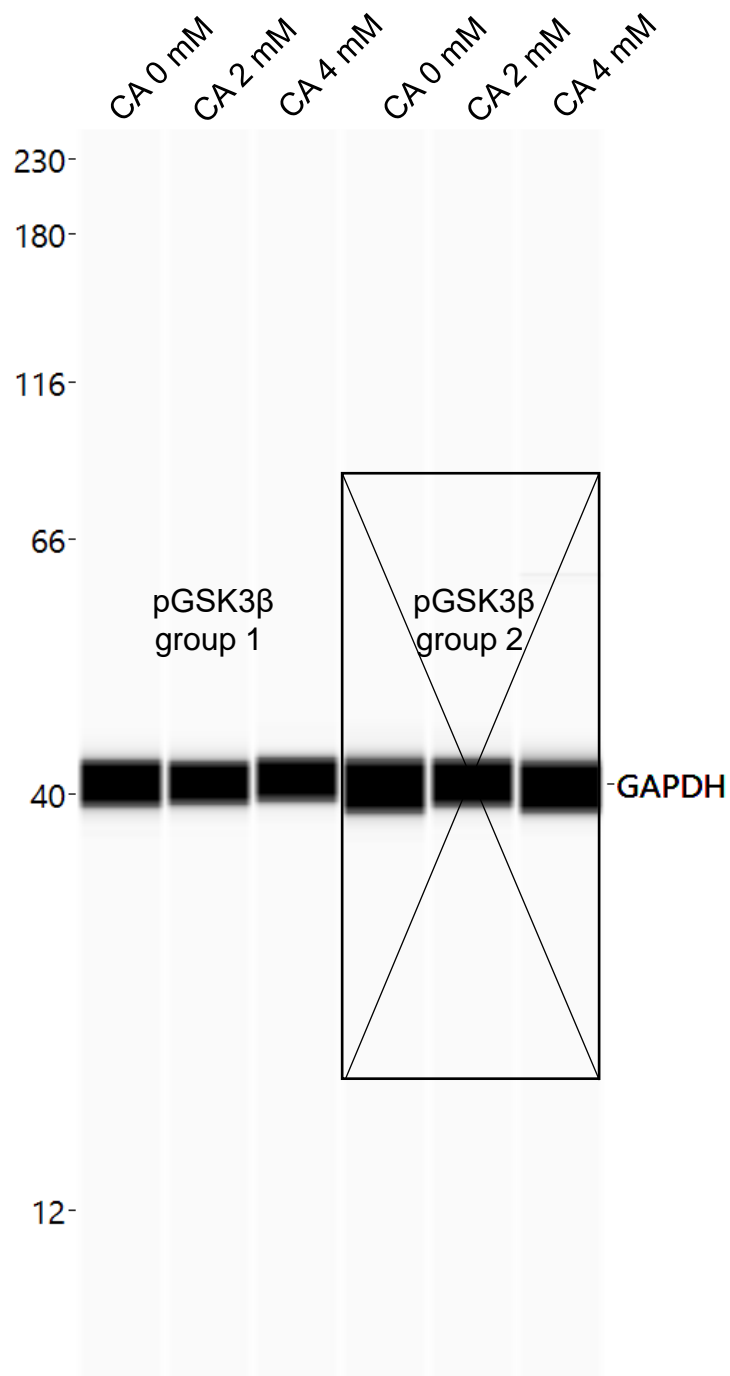

Fig 4A  $\beta$ -catenin

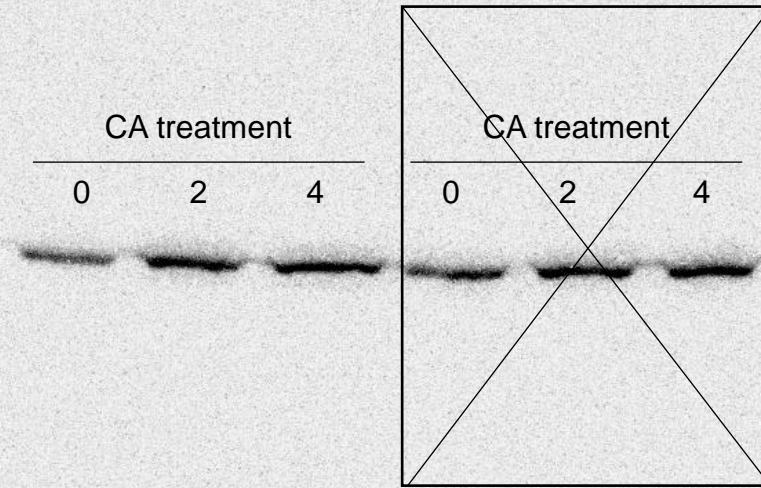

Fig 4A  $\beta$ -actin ( $\beta$ -catenin)

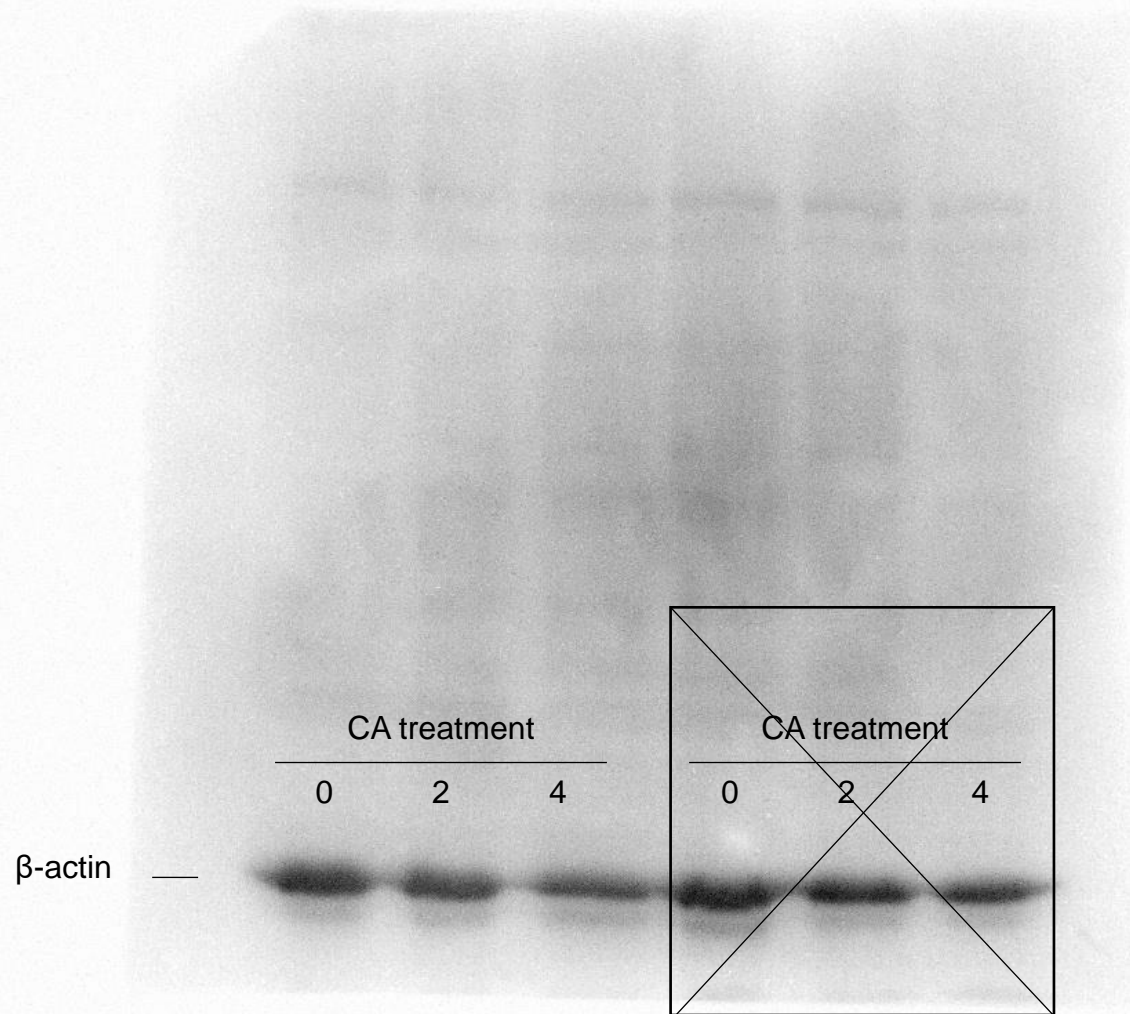

Fig 4B MITF

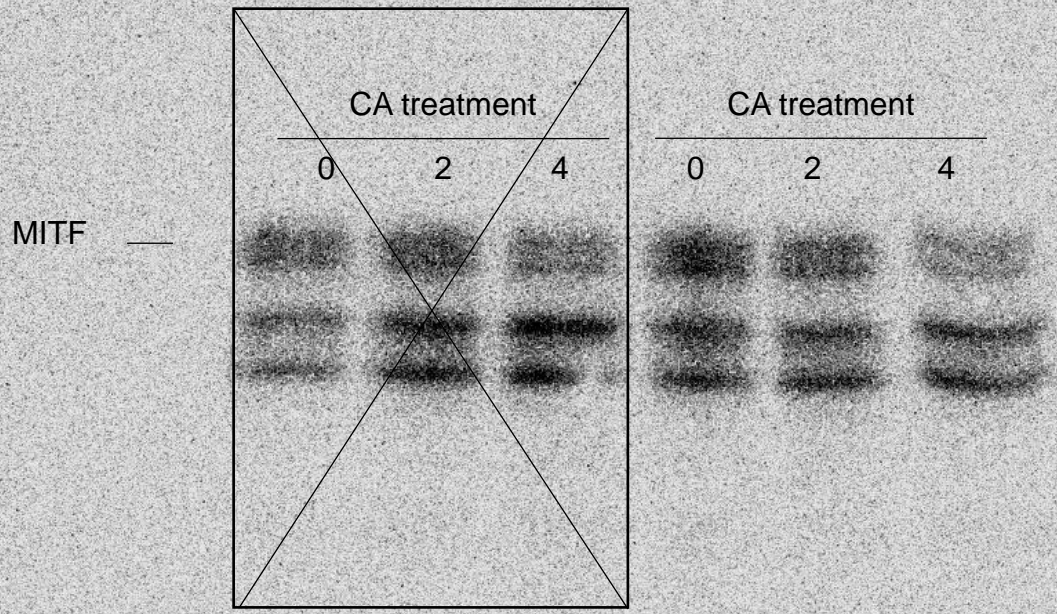



Fig 4B  $\beta$ -actin (MITF)

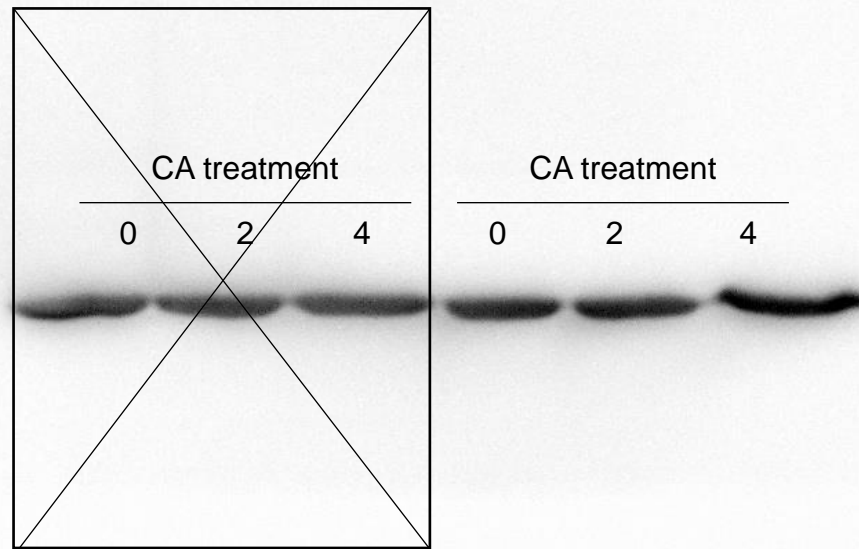

**Fig 4B Tyrosinase**

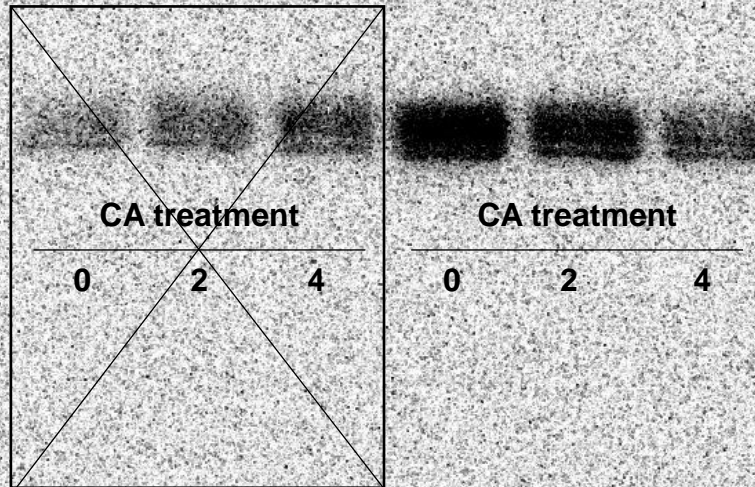

Fig 4B GAPDH (Tyrosinase)

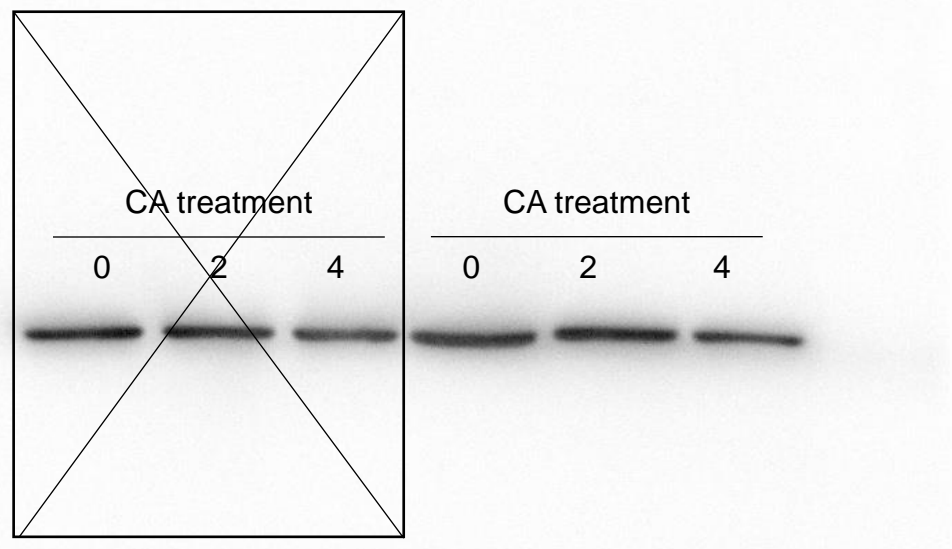

Fig 4B GSK3 $\beta$ , pGSK3 $\beta$  and  $\beta$ -actin

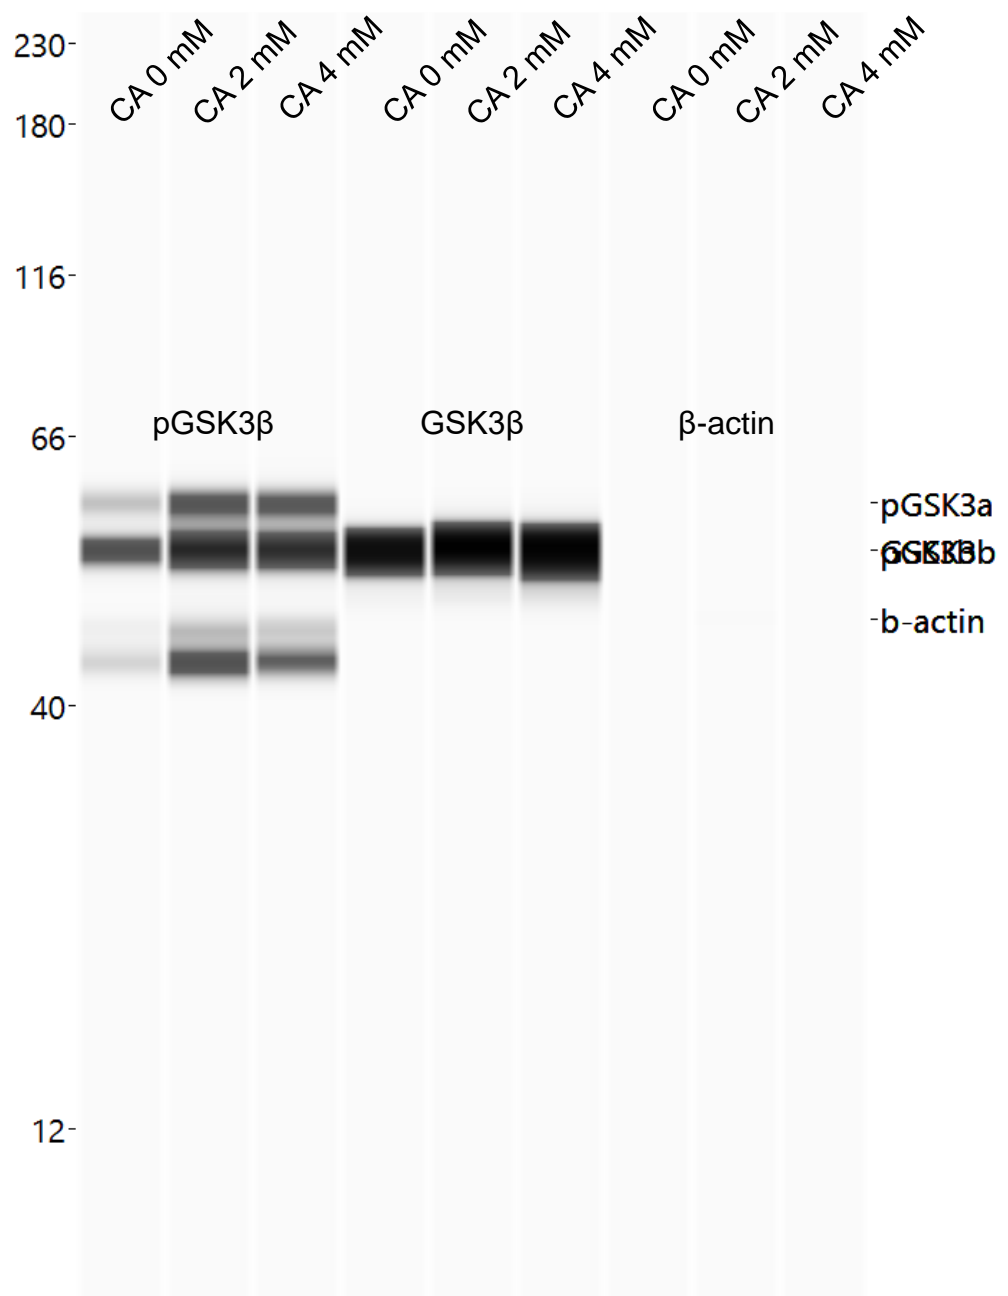

Fig 4B GSK3 $\beta$ , pGSK3 $\beta$  and  $\beta$ -actin (Contrast adjustment for  $\beta$ -actin)

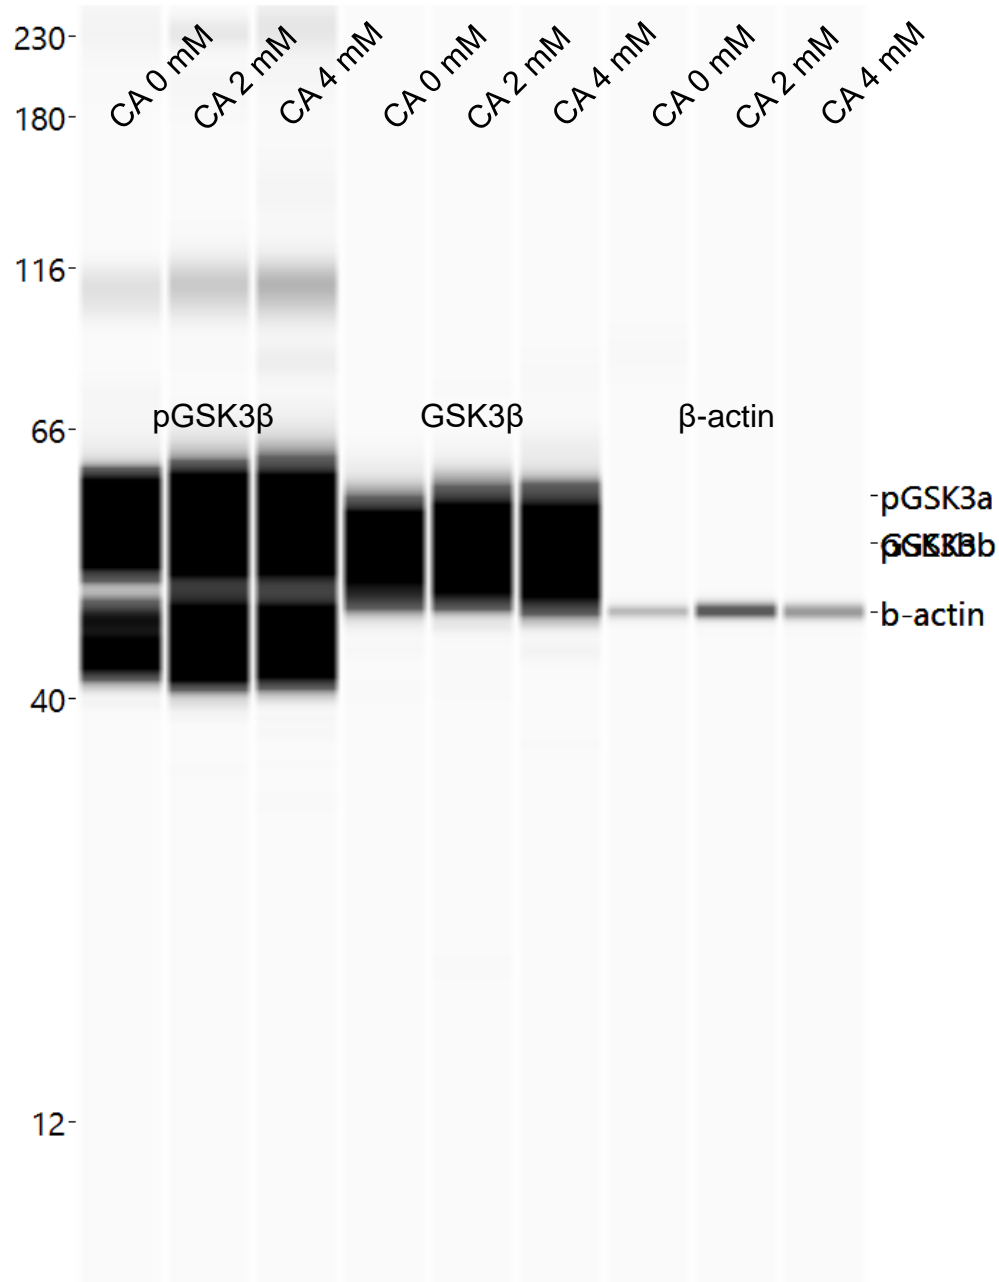

Fig 4B  $\beta$ -catenin

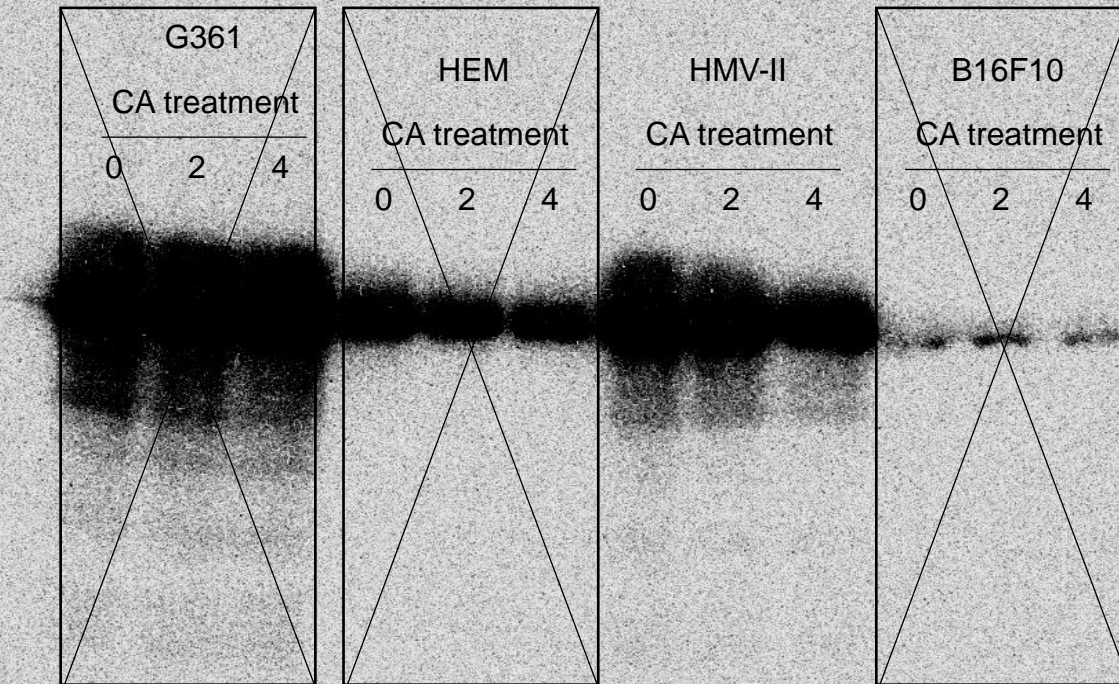

Fig 4B  $\beta$ -actin

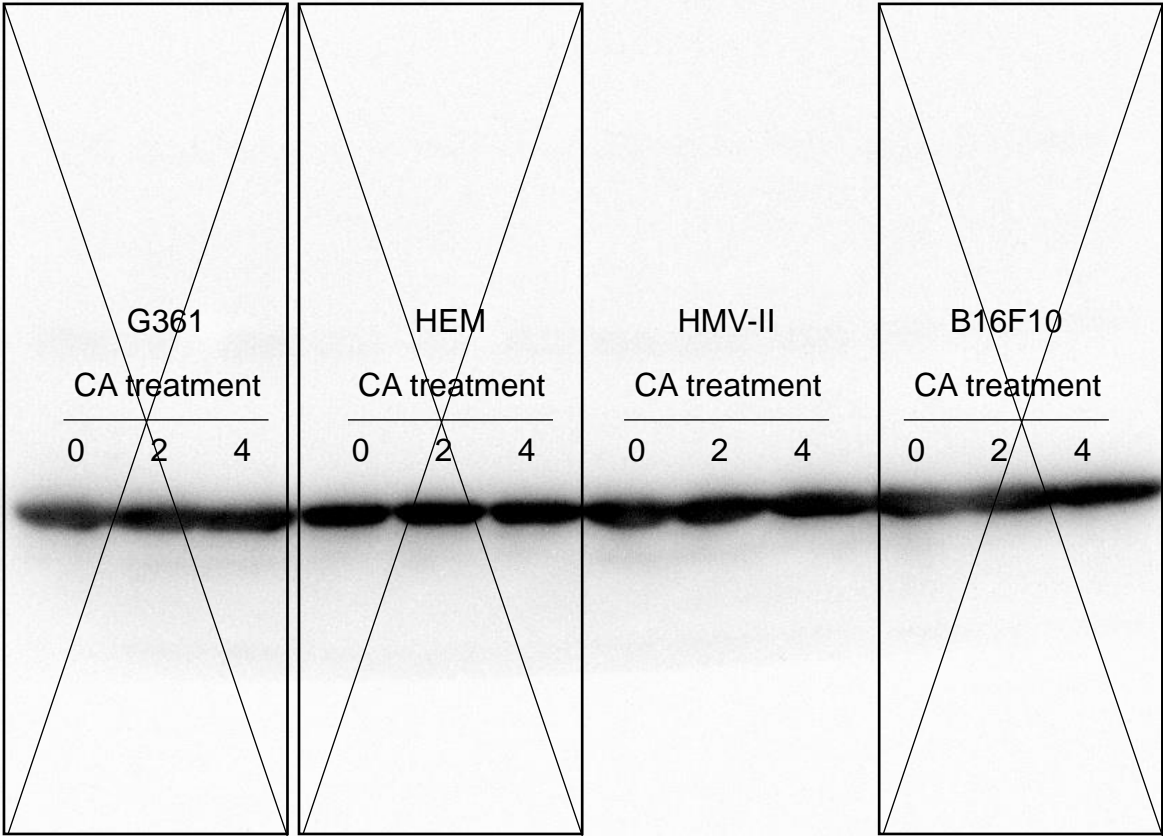

Fig 4C MITF

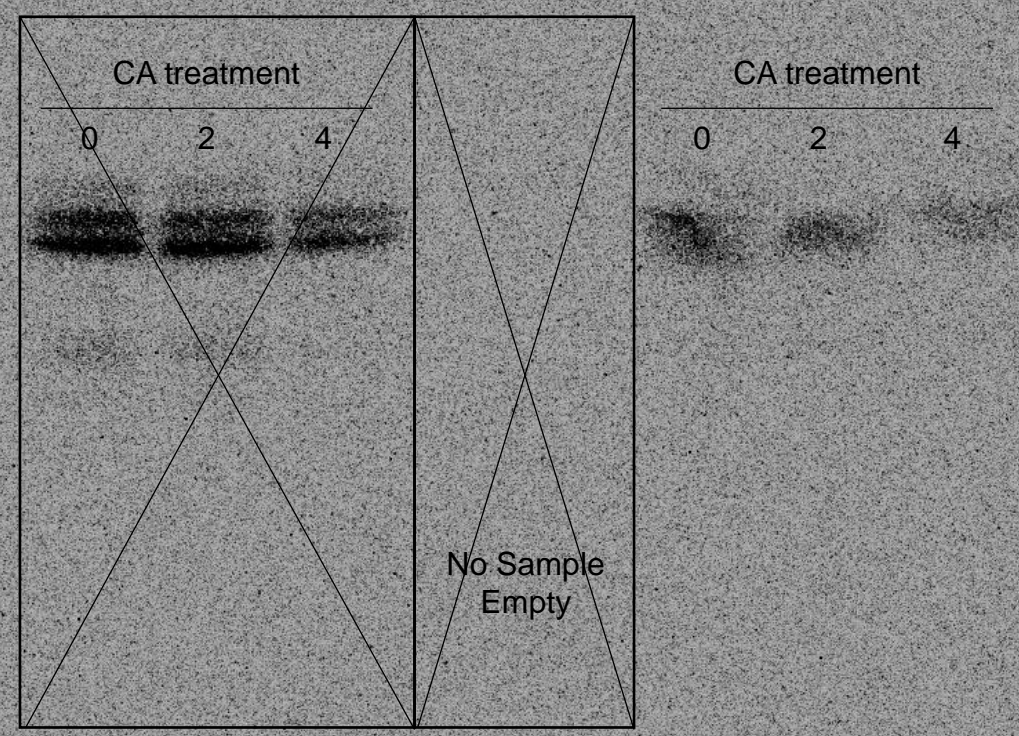



Fig 4C Tyrosinase (same proteins with MITF and  $\beta$ -actin, but on different gel)

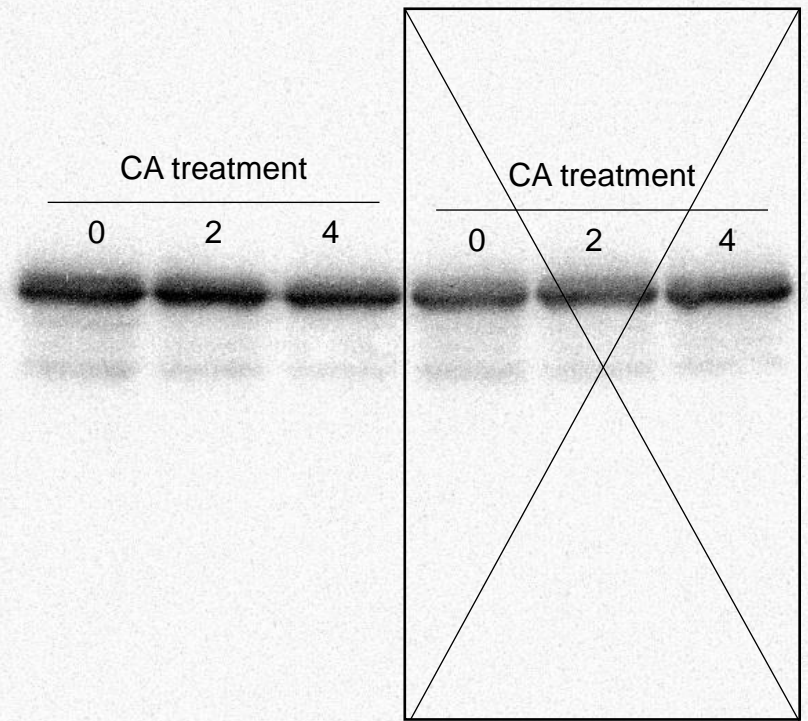

Fig 4C  $\beta$ -actin

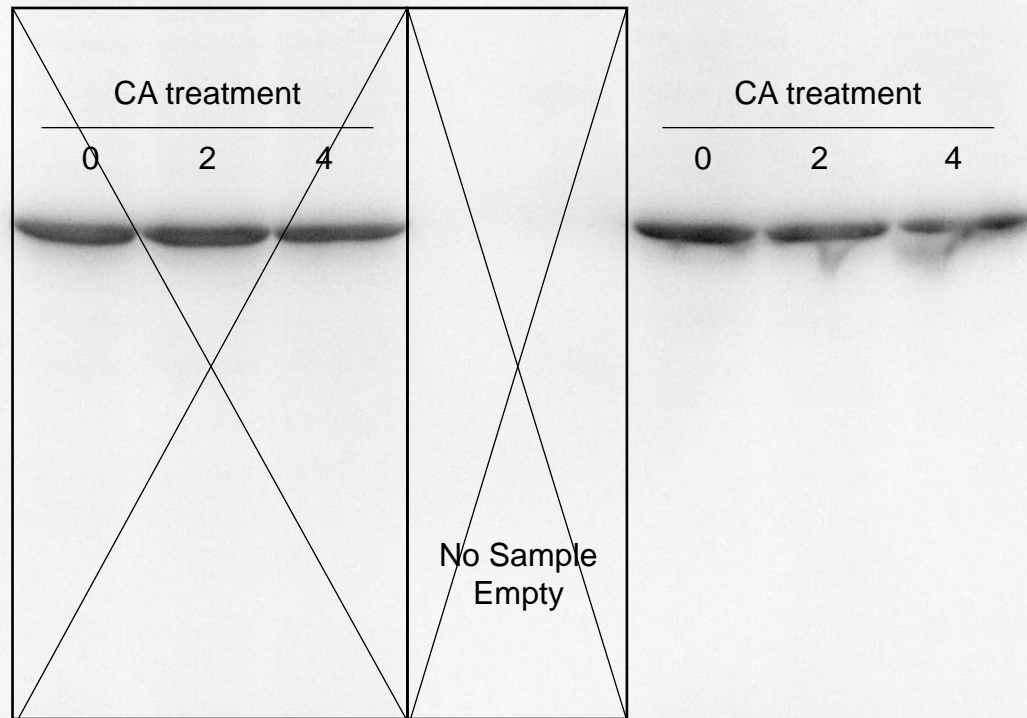

Fig 4C

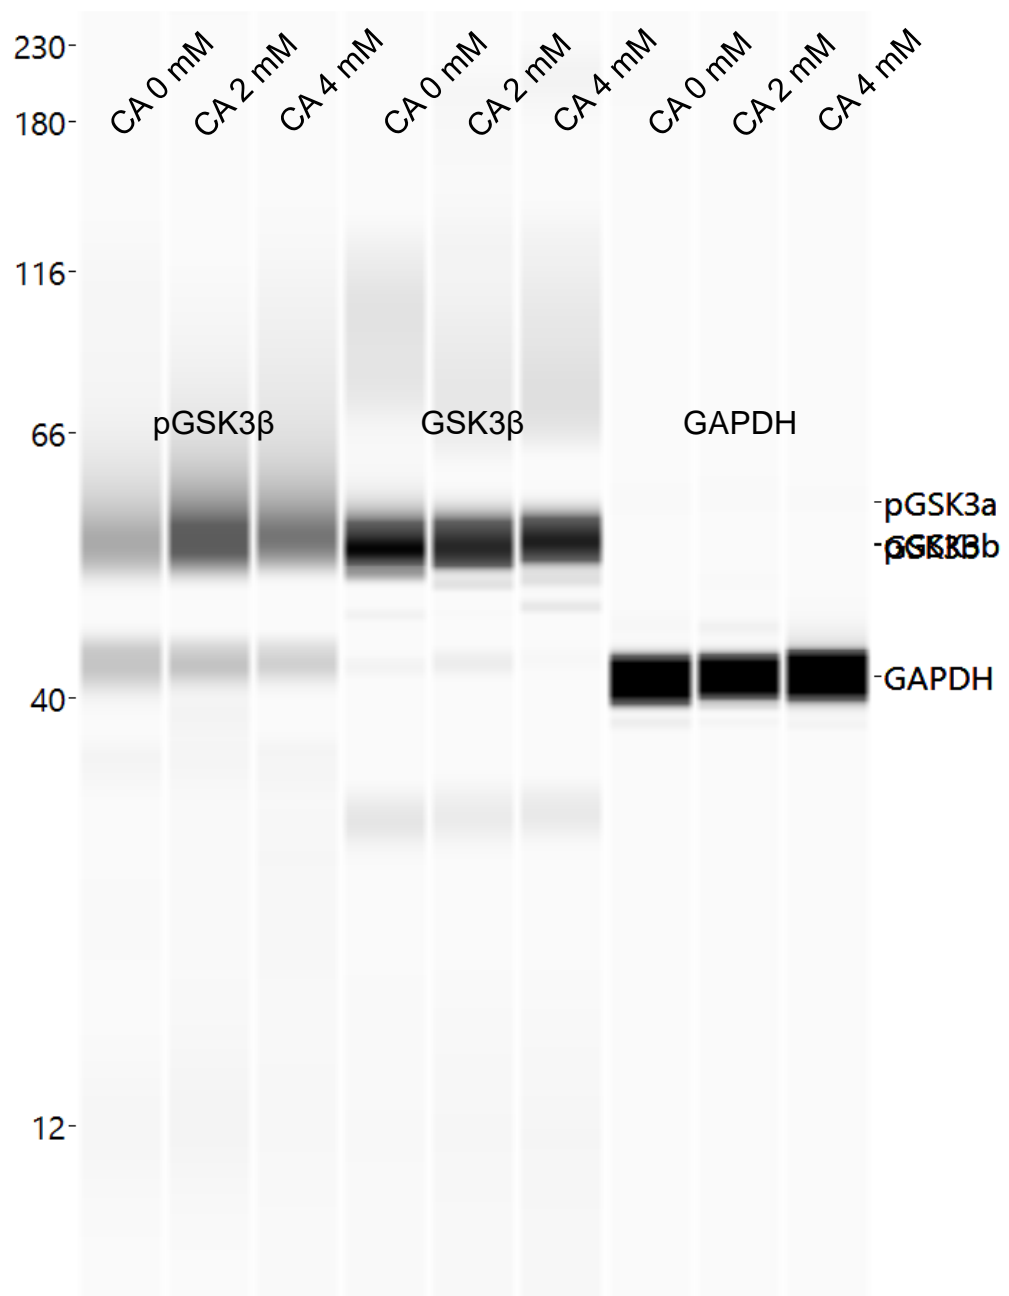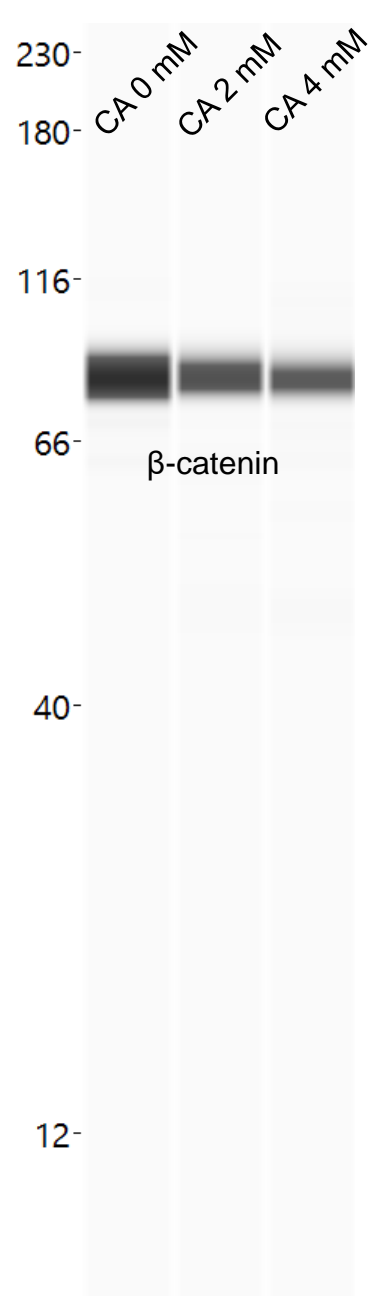

Fig 5B

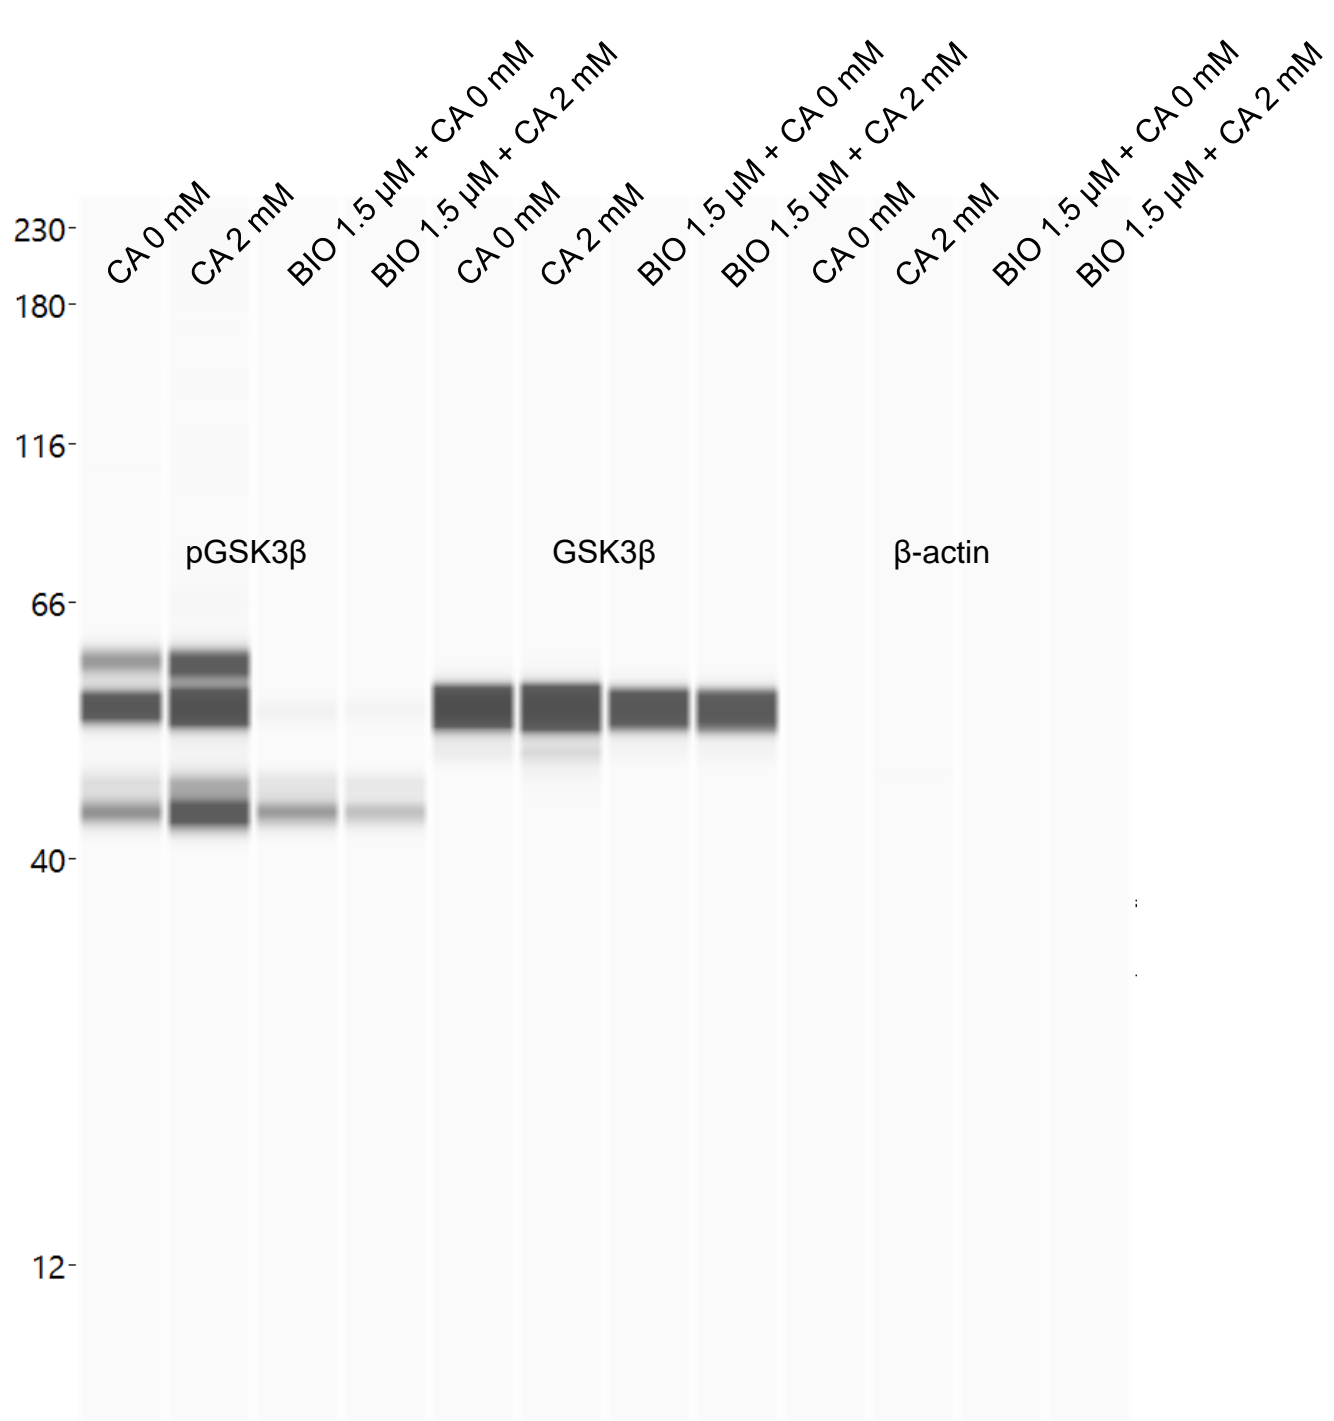

Fig 5B Contrast adjustment for  $\beta$ -actin

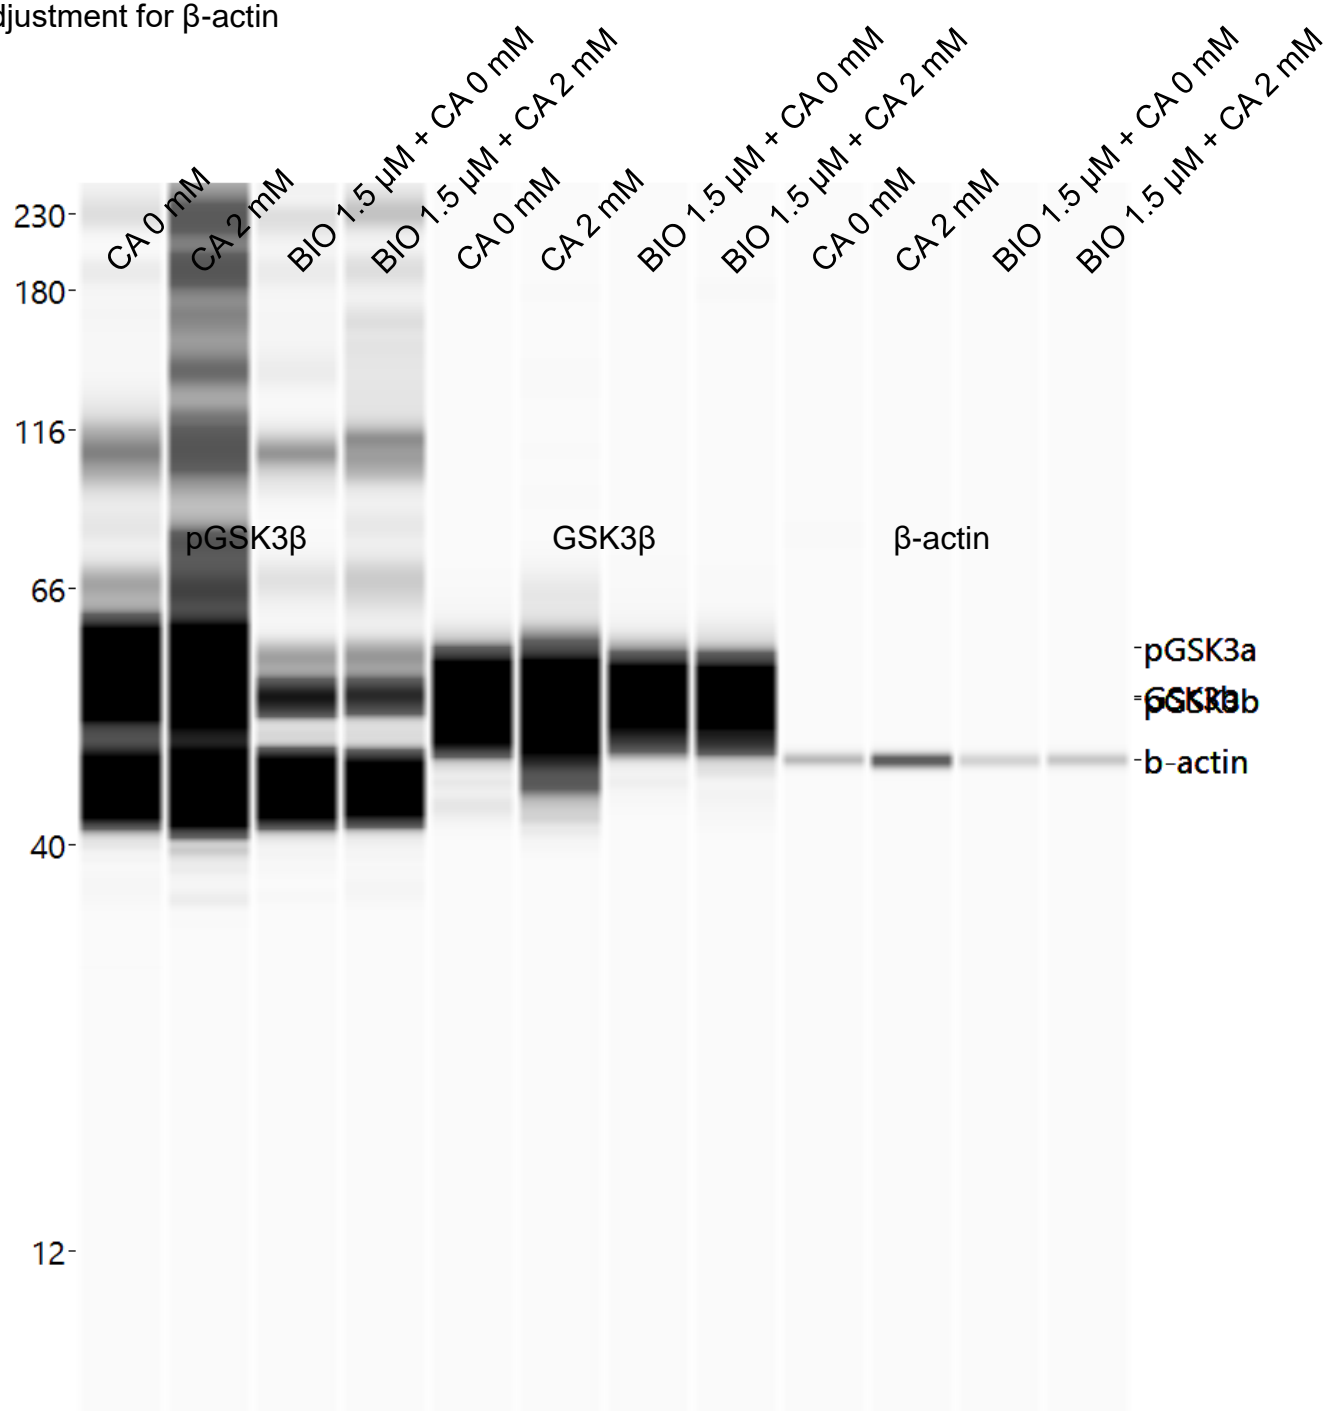

Fig 5B  $\beta$ -catenin

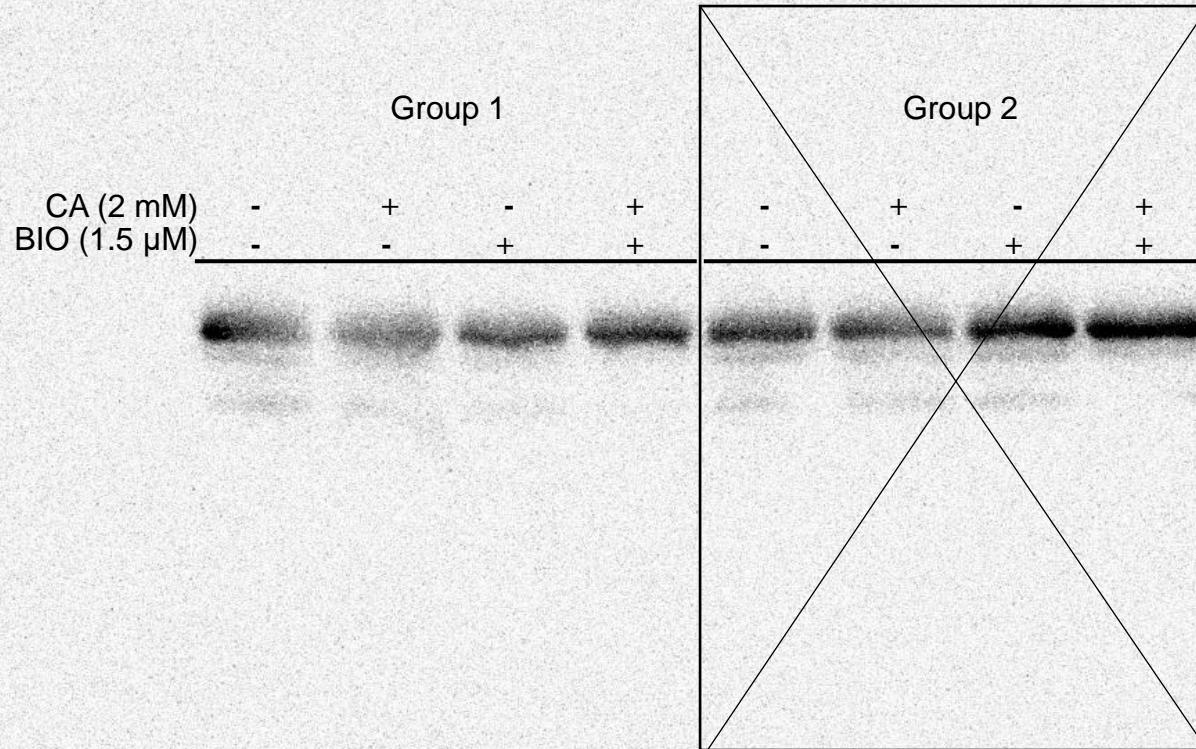

Fig 5B  $\beta$ -actin

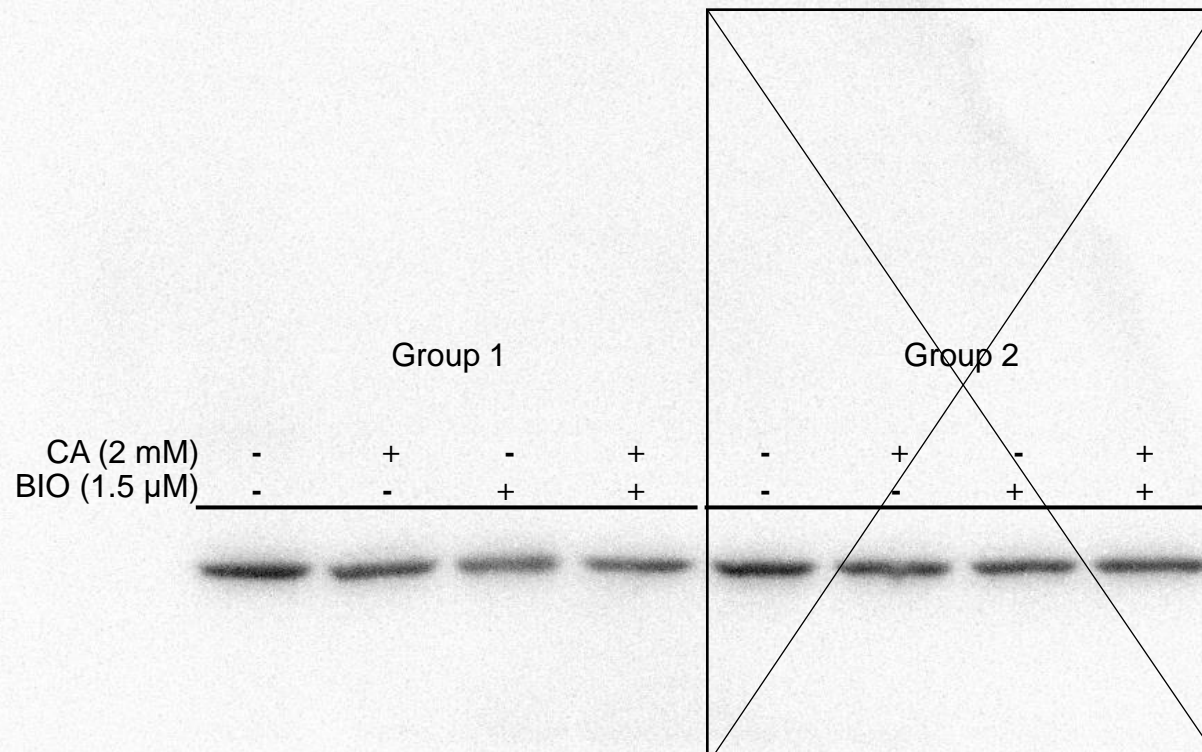

Fig 5D

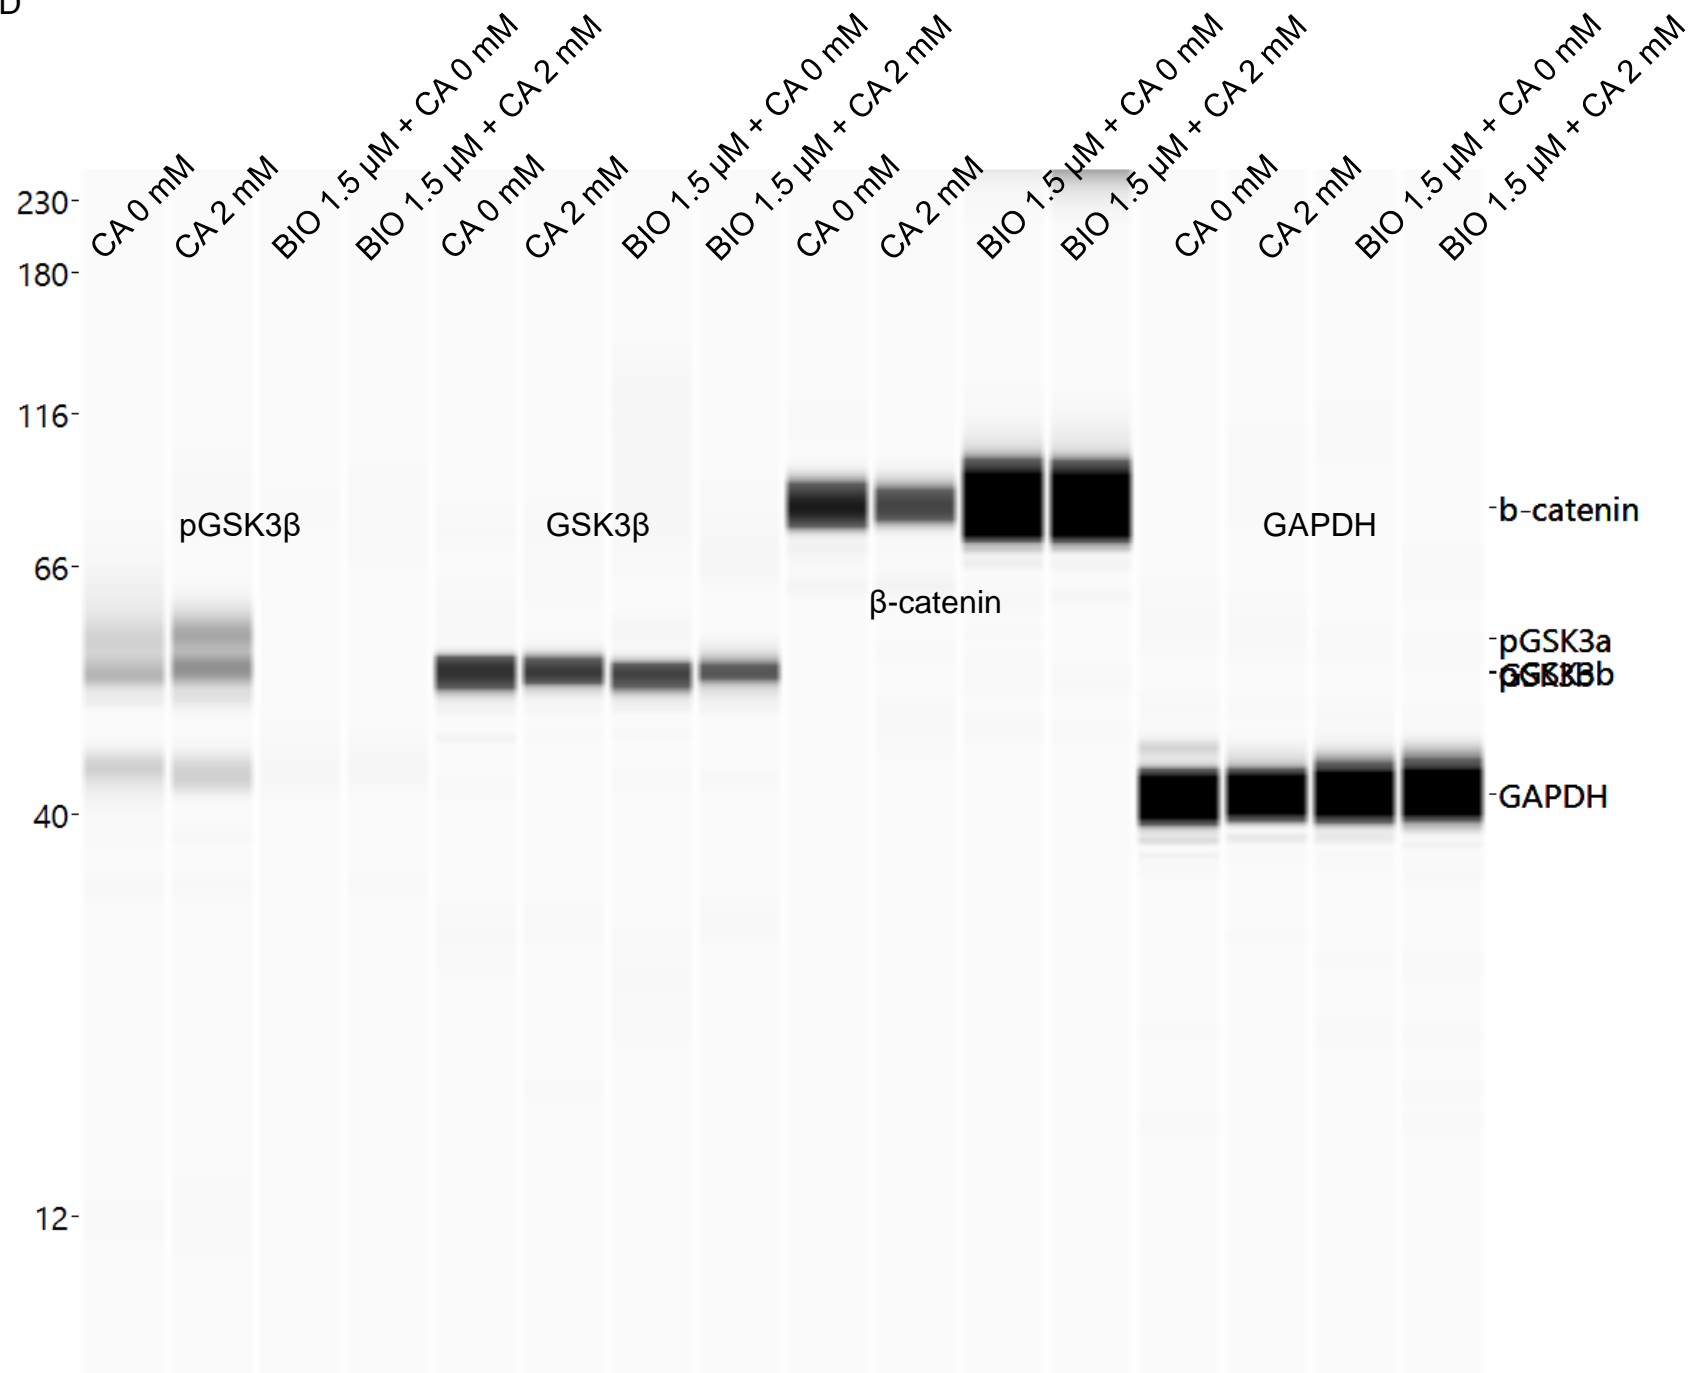

Supplement: pone.0243565.s002.pdf [file pone.0243565.s002.pdf]
